# Supplementary material
Source: Springer Nature journal article supplement (https://www.springermedizin.de/resource/supplementary/13063_2009_379_MOESM3_ESM.pdf/9618108)
Supplement: MOESM3 [file 9618108]

|                                                                   | Visit 1<br>(Screening) | Visit 2<br>(OP) | Visit 3<br>(day x post<br>OP) | Visit 4<br>(day of<br>discharge) | Visit 5<br>(30 days post<br>OP) |
|-------------------------------------------------------------------|------------------------|-----------------|-------------------------------|----------------------------------|---------------------------------|
| Patient information                                               | X                      |                 |                               |                                  |                                 |
| Informed consent                                                  | X                      |                 |                               |                                  |                                 |
| Demographic data                                                  | X                      |                 |                               |                                  |                                 |
| Smoker/ non-smoker                                                | X                      |                 |                               |                                  |                                 |
| Inclusion/exclusion                                               | X                      |                 |                               |                                  |                                 |
| Past medical history                                              | X                      |                 |                               |                                  |                                 |
| Physical examination                                              | X                      | X               | X 1)                          | X 1)                             | X 1)                            |
| Surgery                                                           |                        | X               |                               |                                  |                                 |
| Time to obtain hemostasis                                         |                        | X               |                               |                                  |                                 |
| Deviation from surgical rocedures as described in<br>the protocol |                        | X               |                               |                                  |                                 |
| Number of used devices                                            |                        | X               |                               |                                  |                                 |
| Intraoperative handling of the devices                            |                        | X               |                               |                                  |                                 |
| Duration of drainage/ total olume of drainage                     |                        |                 | X                             | X                                |                                 |
| Number of blood substitutes                                       |                        | X               |                               |                                  |                                 |
| Recurrence of bleeding                                            |                        | X               | X                             | X                                |                                 |
| Adverse Event / Serious Adverse Event                             |                        | X               | X                             | X                                | X                               |
| Local and general complication / re-operation                     |                        | X               | X                             | X                                | X                               |
| Mortality                                                         |                        |                 |                               |                                  | X                               |
|                                                                   |                        |                 |                               |                                  |                                 |
| * date of birth, weight, height                                   |                        |                 |                               |                                  |                                 |
| 1) of the operational wound                                       |                        |                 |                               |                                  |                                 |
